# Supplementary material for: Changes in Arctic Ocean plankton community structure and trophic dynamics on seasonal to interannual timescales
Source: Copernicus journal article supplement (doi:10.5194/bg-21-4951-2024), 2024-11-14
Supplement: Supplementary file 1 [file bg-21-4951-2024-supplement.pdf]

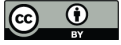

*Supplement of*

## **Changes in Arctic Ocean plankton community structure and trophic dynamics on seasonal to interannual timescales**

**Gabriela Negrete-García et al.**

*Correspondence to:* Gabriela Negrete-García ([g1negret@ucsd.edu](mailto:g1negret@ucsd.edu))

The copyright of individual parts of the supplement might differ from the article licence.

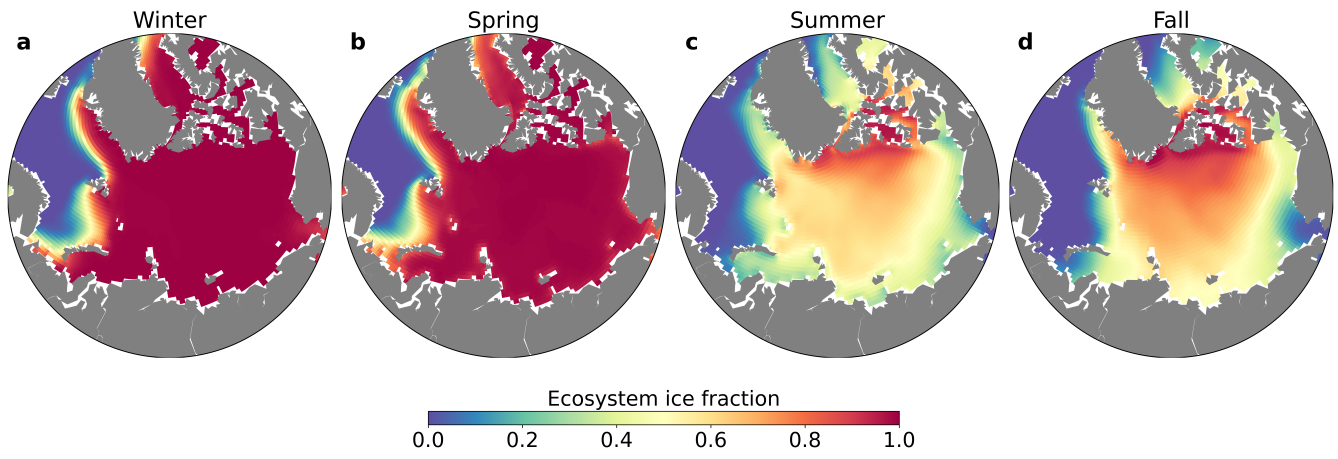

**Figure S1.** Ecosystem ice fraction in winter (a; December-February), spring (b; March-May), summer (c; June-August), and fall (d; September-November), averaged over 1990-2009



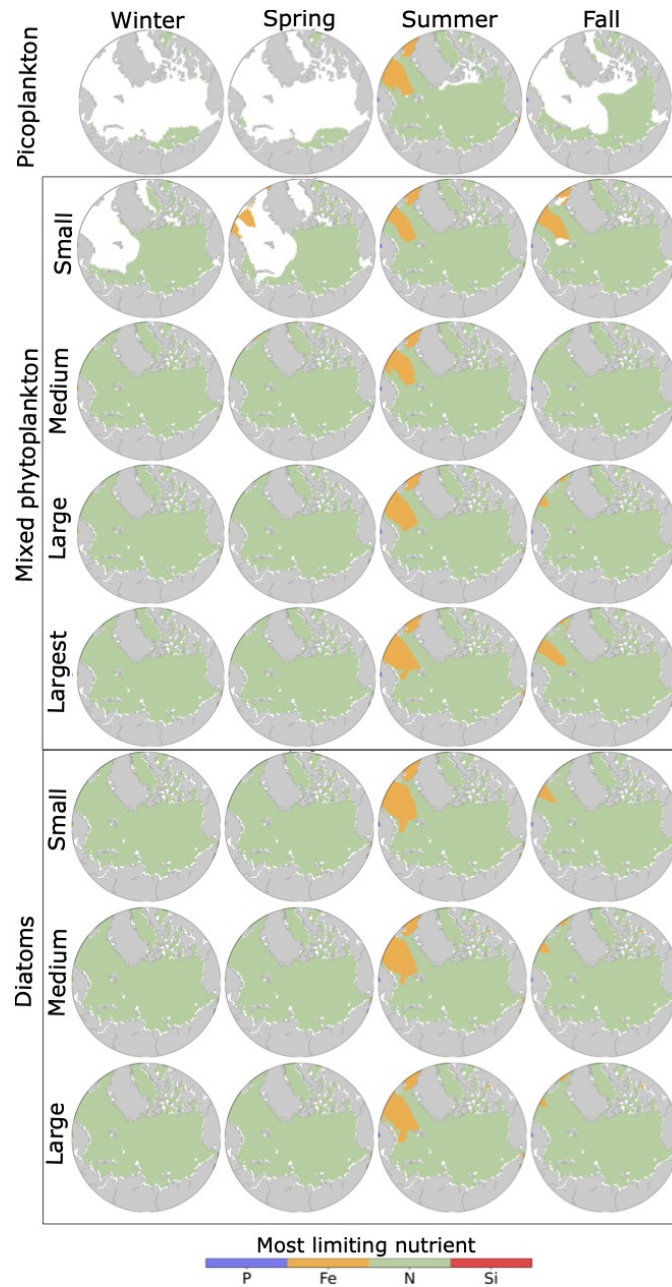

**Figure S2.** Most limiting nutrient for each phytoplankton group in the Arctic Ocean. The most limiting nutrients (Phosphate-purple, Iron-yellow, Nitrate-green, and Silica-red) for each phytoplankton type were averaged over the three months in each season, averaged over 1990-2009. White regions represent areas where no nutrient was limiting. Silicate was only considered for diatoms.

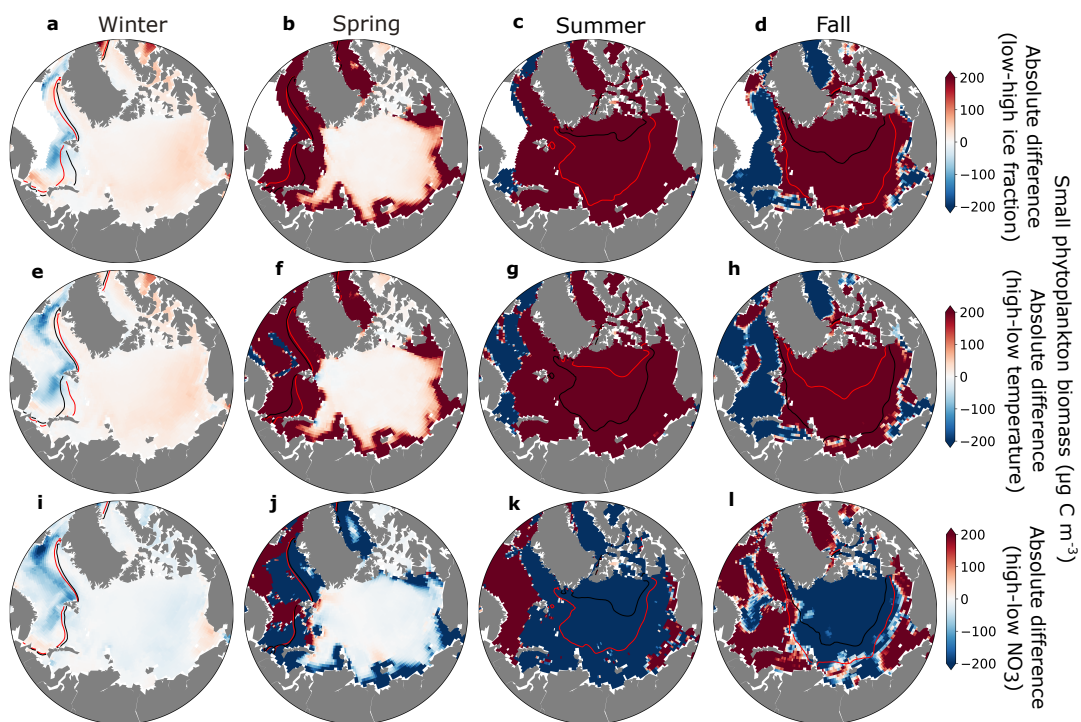

**Figure S3.** Absolute differences in small phytoplankton (picoplankton (pp), diazotrophs (diaz), small mixed phytoplankton (mp1,mp2), and small diatoms (diat1)) biomass over the top 150 meters ( $\mu\text{g C m}^{-3}$ ) between low and high ice (a-d), temperature (e-h), and  $\text{NO}_3$  (i-l) years for winter (a,e,i), spring (b,f,j), summer (c,g,k), and fall (d,h,l). Black contour lines indicate the sea-ice extent in years with high ice fraction (a-d), low temperatures (e-h), and low nutrients (i-l). Red contour lines indicate sea-ice extent in years with low ice fraction (a-d), high temperature (e-h), high nutrients (i-l).

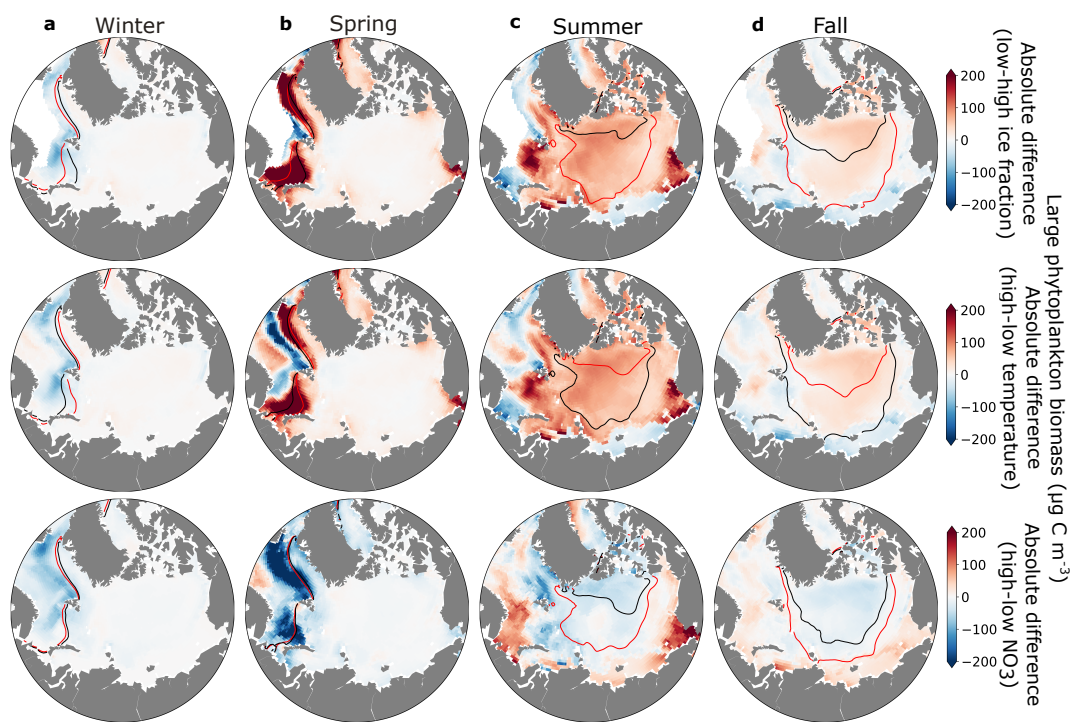

**Figure S4.** Absolute differences in large phytoplankton (medium and large mixed phytoplankton (mp3,mp4), and diatoms (diat2,diat3)) biomass over the top 150 meters ( $\mu\text{gC m}^{-3}$ ) between low and high ice (a-d), temperature (e-h), and  $\text{NO}_3$  (i-l) years for winter (a,e,i), spring (b,f,j), summer (c,g,k), and fall (d,h,l). Black contour lines indicate the sea-ice extent in years with high ice fraction (a-d), low temperatures (e-h), and low nutrients (i-l). Red contour lines indicate sea-ice extent in years with low ice fraction (a-d), high temperature (e-h), high nutrients (i-l).

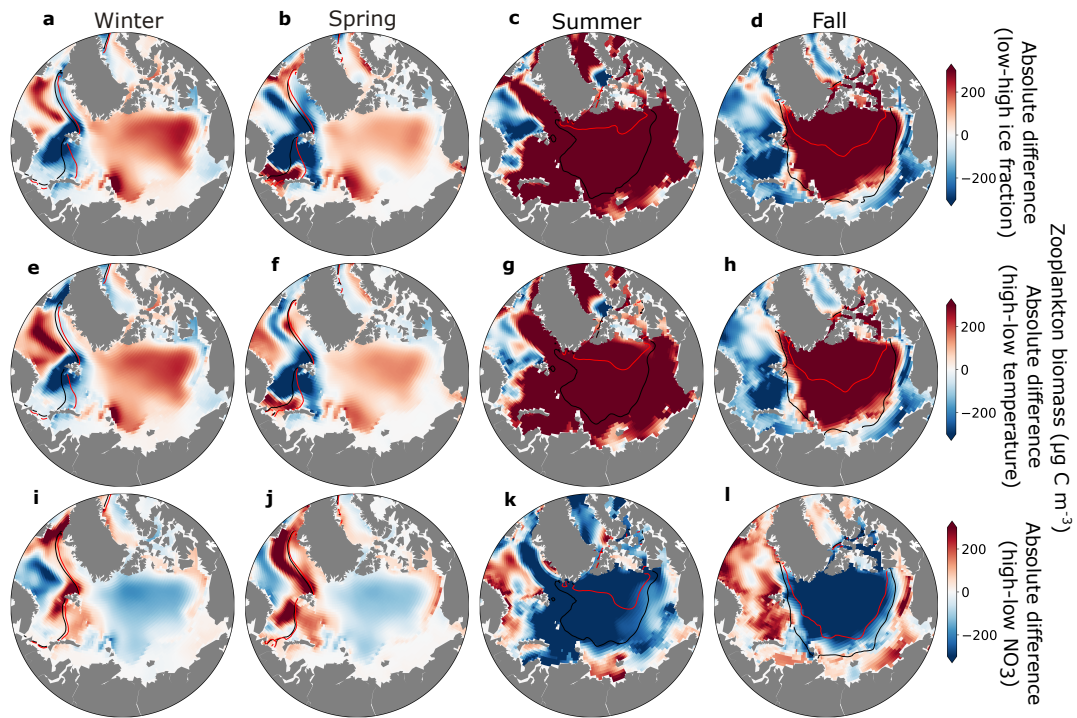

**Figure S5.** Absolute differences in zooplankton biomass over the top 150 meters ( $\mu\text{gC m}^{-3}$ ) between low and high ice (a-d), temperature (e-h), and  $\text{NO}_3$  (i-l) years for winter (a,e,i), spring (b,f,j), summer (c,g,k), and fall (d,h,l). Black contour lines indicate the sea-ice extent in years with high ice fraction (a-d), low temperatures (e-h), and low nutrients (i-l). Red contour lines indicate sea-ice extent in years with low ice fraction (a-d), high temperature (e-h), high nutrients (i-l).

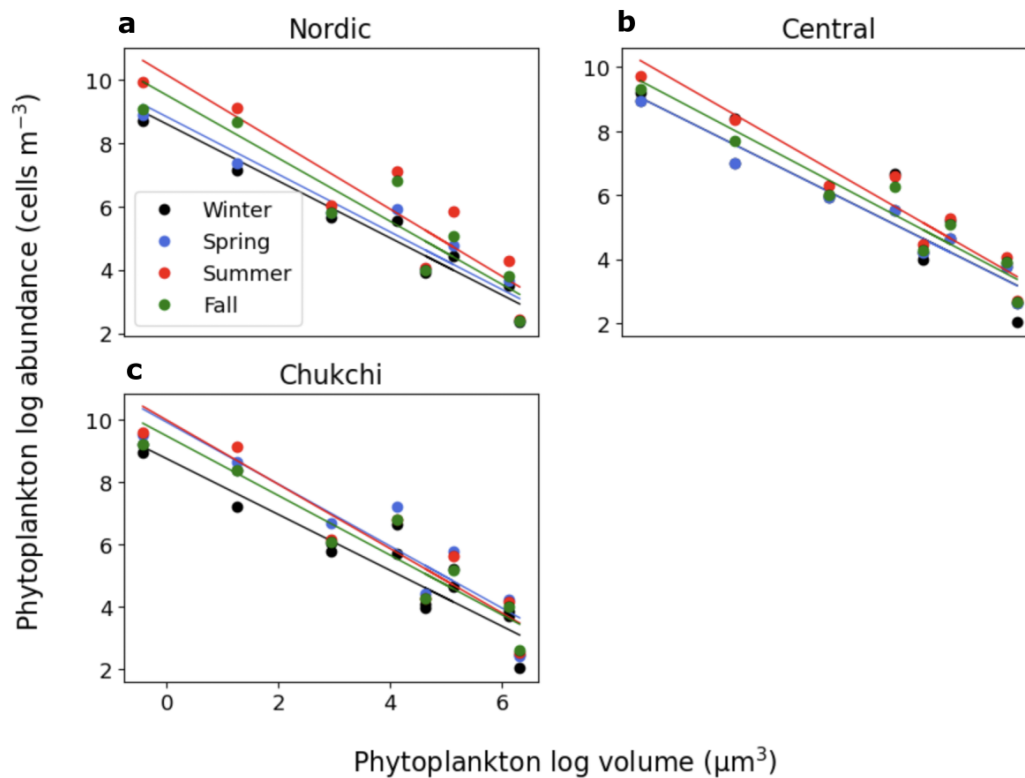

**Figure S6.** Seasonal log-log relationship between phytoplankton abundance (cells  $m^{-3}$ ) and phytoplankton volume ( $\mu m^3$ ) in three locations in the Arctic Ocean (Fig. 1): the Western Nordic Seas (a), the Central Arctic (b) and the Chukchi Sea (c). In this figure, the lines are color-coded to represent different seasons: black lines correspond to winter, blue lines depict spring, red lines indicate summer, and green lines represent the fall.

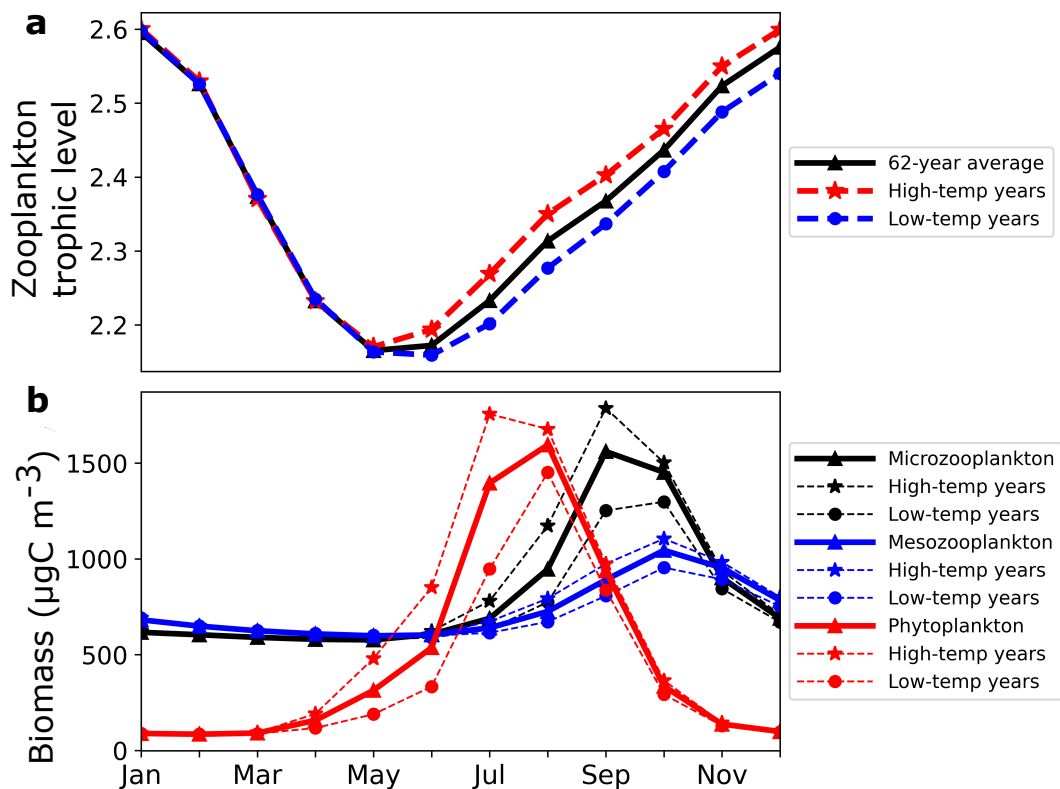

**Figure S7.** (a) Monthly averages of mean zooplankton trophic level (black) compared with mean zooplankton trophic level during high temperature years (red) and low temperature years (blue). (b) Plankton biomass ( $\mu\text{gC m}^{-3}$ ), including microzooplankton (black), mesozooplankton (blue), and phytoplankton (red). The solid lines represent the 62-year average, while dashed stars and circles indicate high-temperature and low-temperature seasonal averages, respectively.
